# Supplementary material for: The Influence of the Degree of Forest Management on Methylmercury and the Composition of Microbial Communities in the Sediments of Boreal Drainage Ditches
Source: MDPI journal article supplement (doi:10.3390/microorganisms10101981), 2022-10-06
Supplement: s1 [file s1]

## Supplementary Information

for: **The influence of the degree of forest management on methylmercury and the composition of microbial communities in the sediments of boreal drainage ditches**

**Table S1** Topographical characteristics of sub-catchments of watercourses corresponding to each sampling site.

| Parameters of sub-catchment, unit                                   | Sampling site |        |        |        |        |        |        |        |
|---------------------------------------------------------------------|---------------|--------|--------|--------|--------|--------|--------|--------|
|                                                                     | Site 1        | Site 2 | Site 3 | Site 4 | Site 5 | Site 6 | Site 7 | Site 8 |
| Sub-catchment area, ha                                              | 27.8          | 54.6   | 11.0   | 70.6   | 758.5  | 256.4  | 314.1  | 665.2  |
| Elevation (min-max), m                                              | 95.8          | 95.8   | 99.1   | 93.1   | 93.4   | 92.9   | 96.4   | 114.3  |
| Elevation (max), m                                                  | 98.7          | 101.7  | 99.6   | 106.8  | 132.3  | 99.9   | 132.3  | 169.1  |
| Total ditch length, km                                              | 0.05          | 0.58   | 0.00   | 3.03   | 63.65  | 18.69  | 24.60  | 12.34  |
| Ditch density, m ha <sup>-1</sup>                                   | 1.9           | 10.7   | 0.0    | 42.9   | 83.9   | 72.9   | 78.3   | 18.6   |
| Forest area, ha                                                     | 25.10         | 51.37  | 9.42   | 65.93  | 717.51 | 242.37 | 304.87 | 452.60 |
| Share of forest area of total sub-catchment area, %                 | 90.1          | 94.0   | 85.5   | 93.3   | 94.6   | 94.5   | 97.1   | 68.0   |
| Share of spruce-dominated forest from the total forest area, %      | 27.7          | 25.8   | 0.0    | 13.1   | 41.2   | 44.6   | 31.8   | 21.0   |
| Share of pine-dominated forest from the total forest area, %        | 63.5          | 69.0   | 74.1   | 54.8   | 39.4   | 38.9   | 45.8   | 41.0   |
| Share of broadleaves-dominated forest from the total forest area, % | 8.8           | 5.2    | 25.9   | 32.2   | 16.7   | 16.5   | 16.2   | 30.8   |

|                                                          |      |      |      |      |      |      |      |      |
|----------------------------------------------------------|------|------|------|------|------|------|------|------|
| Area of clearfellings in sub-catchment, ha               | 0.0  | 0.0  | 0.0  | 0.0  | 19.0 | 0.0  | 18.9 | 14.5 |
| Share of clearfellings from the total forest area, %     | 0.0  | 0.0  | 0.0  | 0.0  | 2.6  | 0.0  | 6.2  | 3.2  |
| Share of drained peatlands from the total forest area, % | 12.0 | 9.6  | 0.0  | 19.1 | 35.8 | 21.7 | 39.8 | 2.4  |
| Share of peatland forests from the total forest area, %  | 40.2 | 29.6 | 51.8 | 0.0  | 1.1  | 0.0  | 2.5  | 5.0  |
| Share of wetlands from the total forest area, %          | 0.0  | 0.0  | 16.0 | 0.0  | 0.5  | 0.0  | 0.7  | 1.0  |

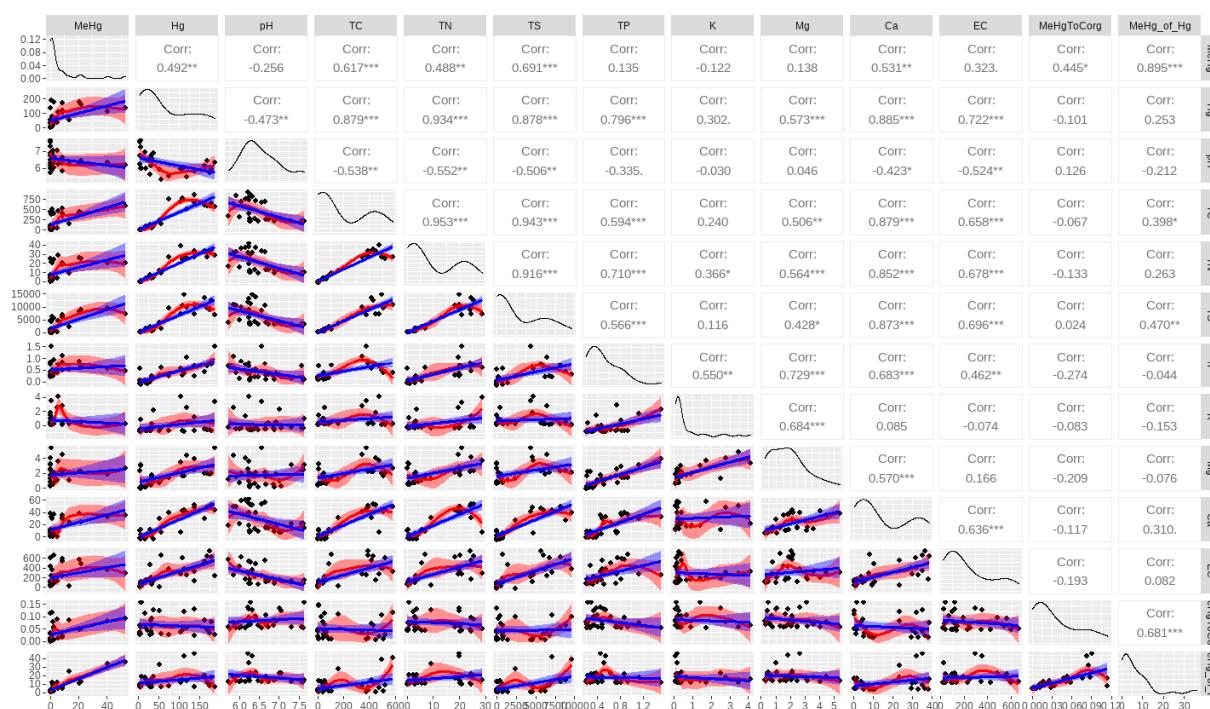

**Figure S1** Scatterplot of environmental variables (untransformed) and their correlations. Patterns are visualized with lm and standard error bounds (blue) or loess and a t-based approximation (red).

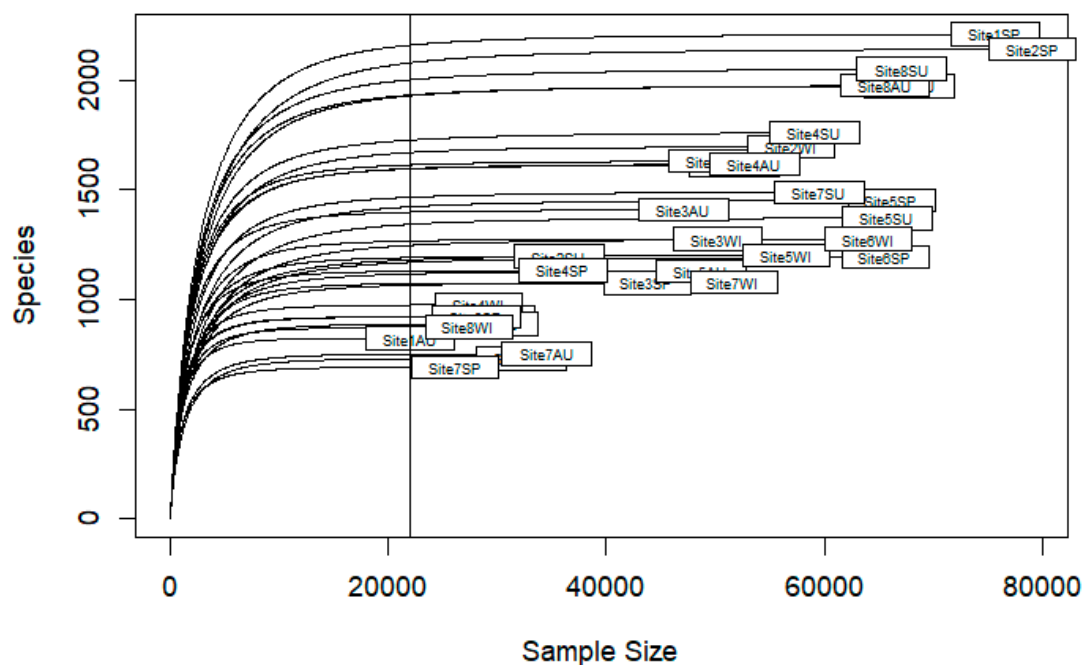

**Figure S2** Rarefaction curves and sequencing depth. The vertical abline indicates on the smallest common number of sequencing reads

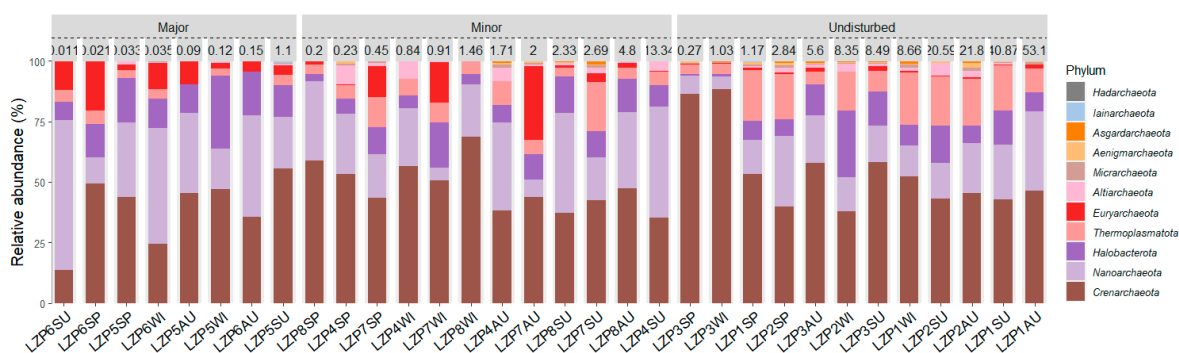

**Figure S3** Bar plot of relative abundance of phylum by the level of disturbance. Samples with 15 the most abundant archaeal phyla are grouped by the level of disturbance and sorted from lowest to highest concentration ( $\mu\text{g kg}^{-1}$ ) of MeHg within each level.

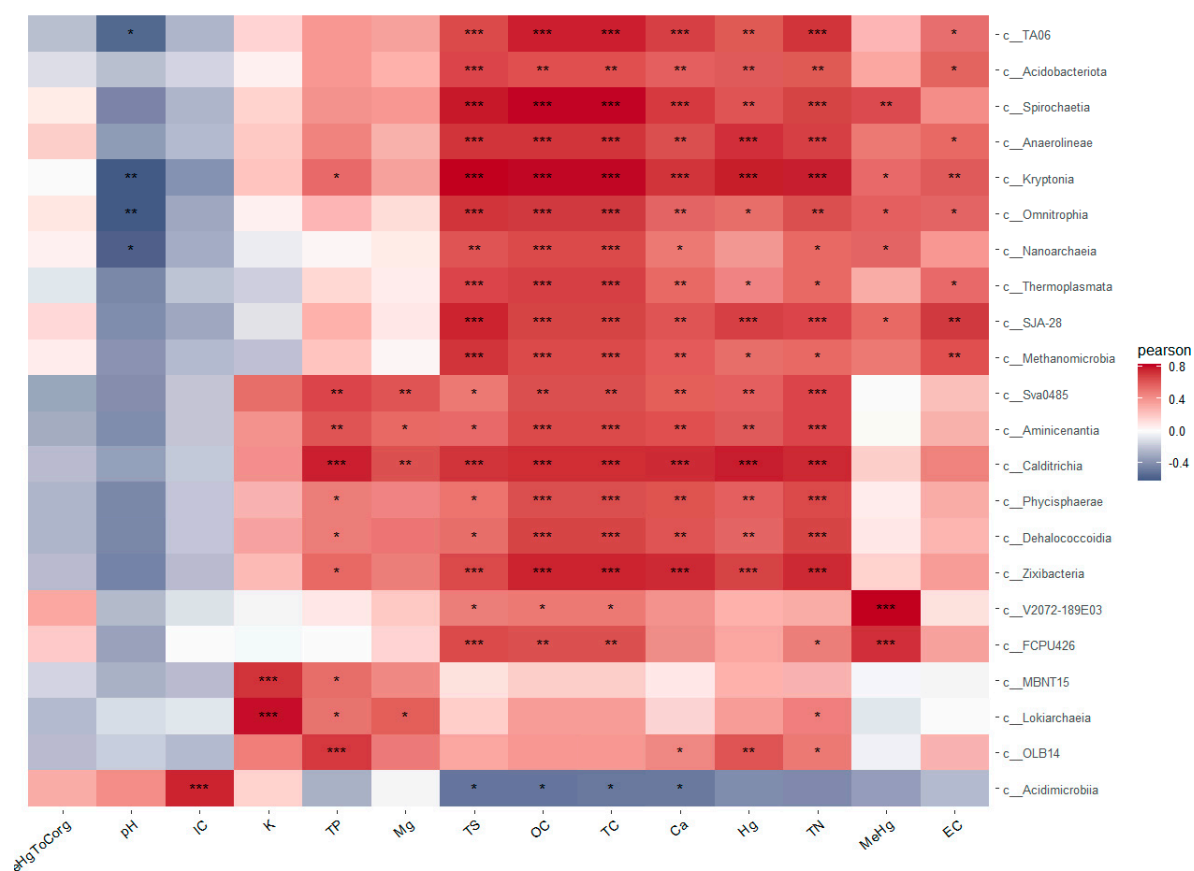

**Figure S4** Unconstrained correlations between environmental variables and classes of bacteria and archaea.

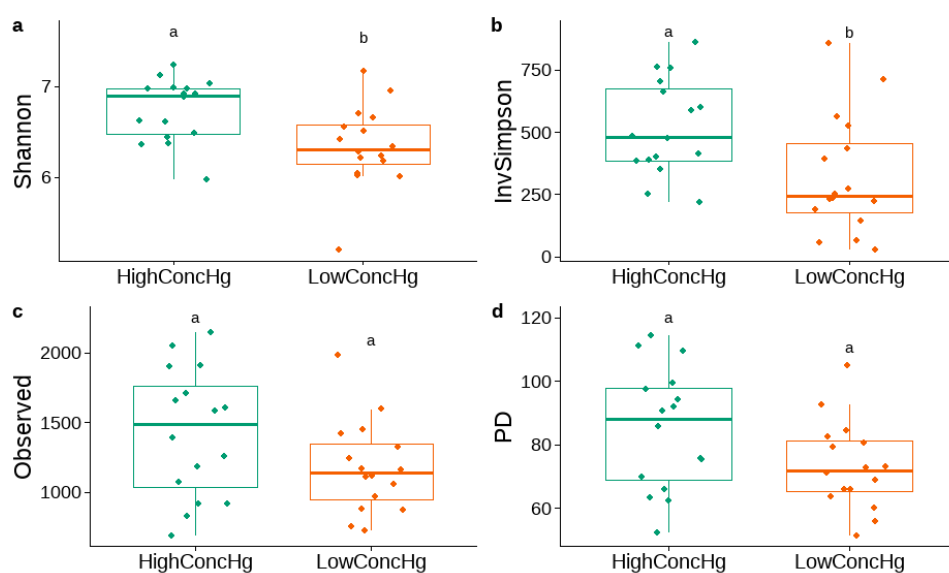

**Figure S5** A one-way ANOVA test on high and low concentration of mercury effect on Alpha diversity.

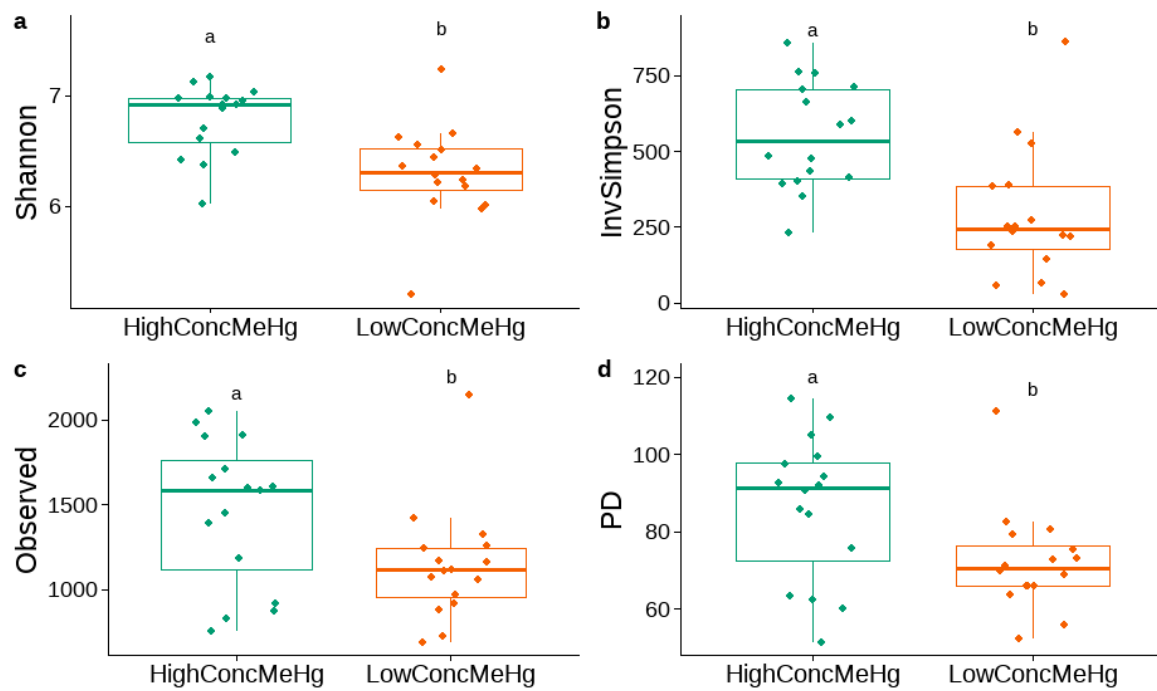

**Figure S6** A one-way ANOVA test on high and low concentration of methylmercury effect on Alpha diversity.

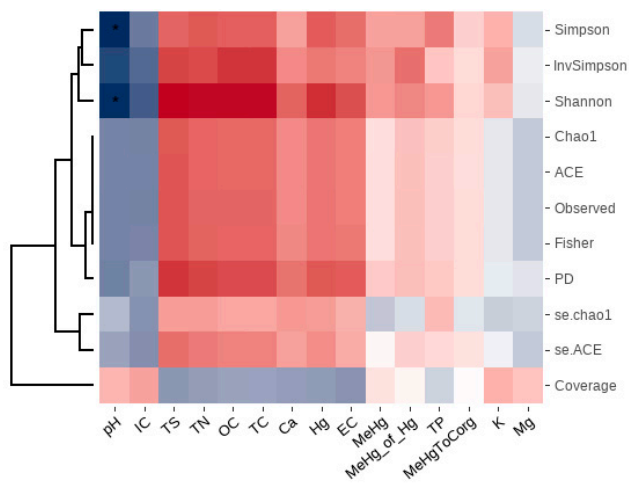

**Figure S7** Spearman correlation heatmap between environmental variables and Alpha diversity metrics.

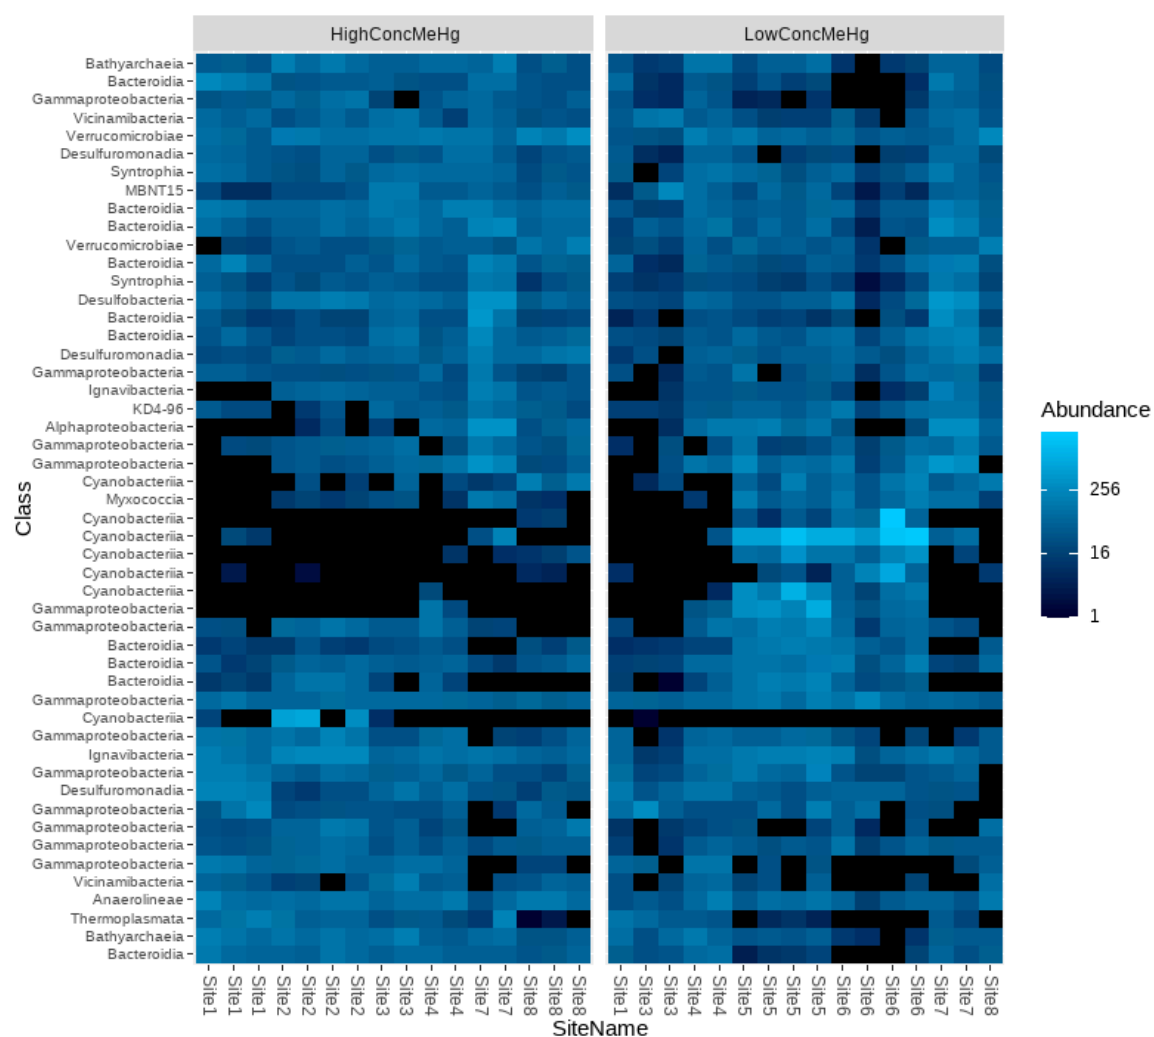

**Figure S8** Abundance heatmap of the top 50 most abundant taxa, separated by the level of MeHg. Clustering is based on Bray-Curtis dissimilarity and NMDS ordination.

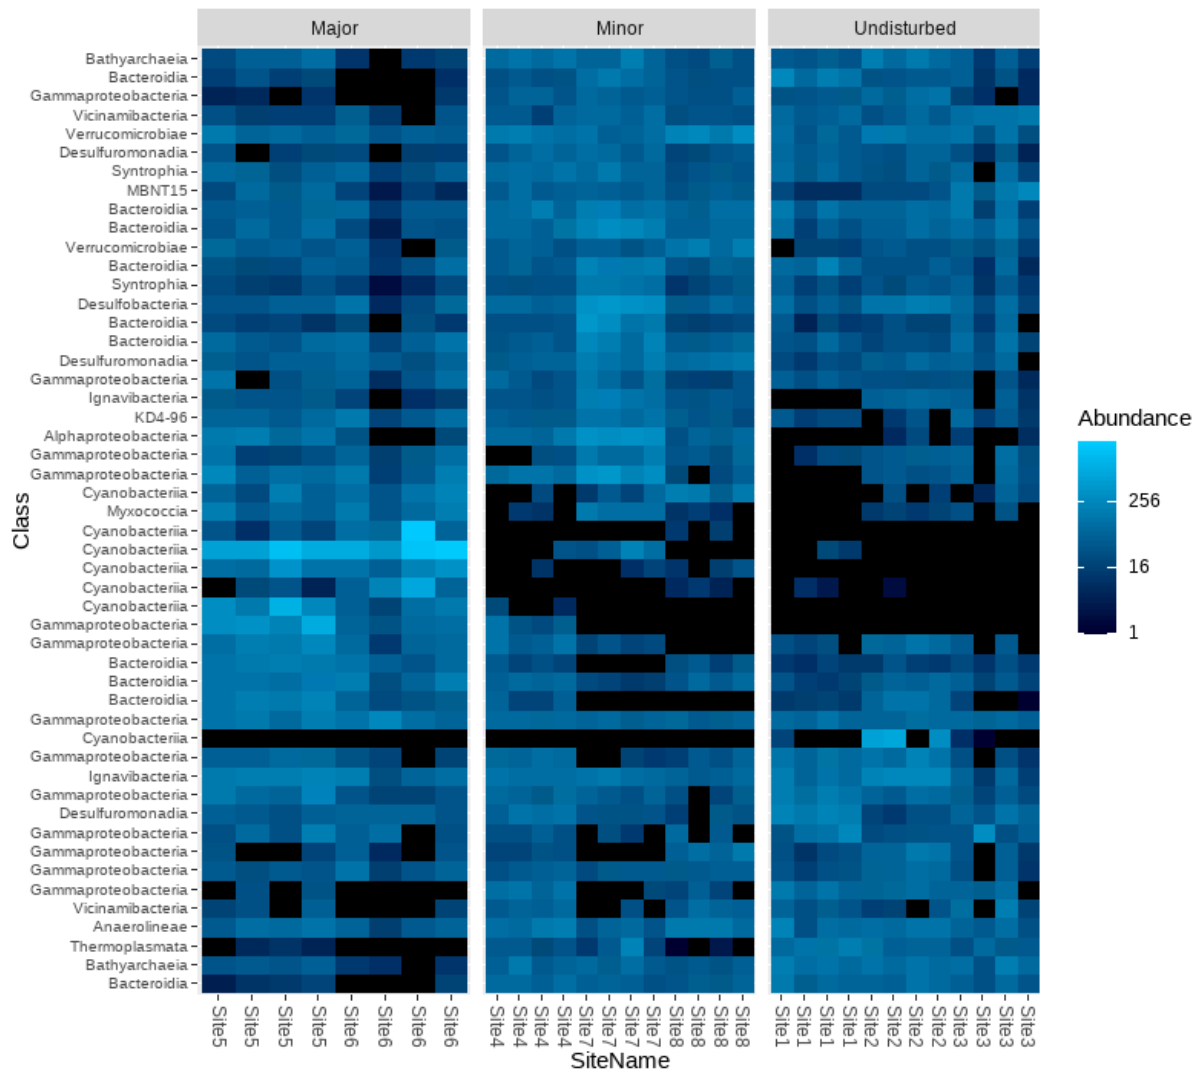

**Figure S9** Abundance heatmap of the top 50 most abundant taxa, separated by the level of disturbance. Clustering is based on Bray-Curtis dissimilarity and NMDS ordination.

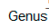

8



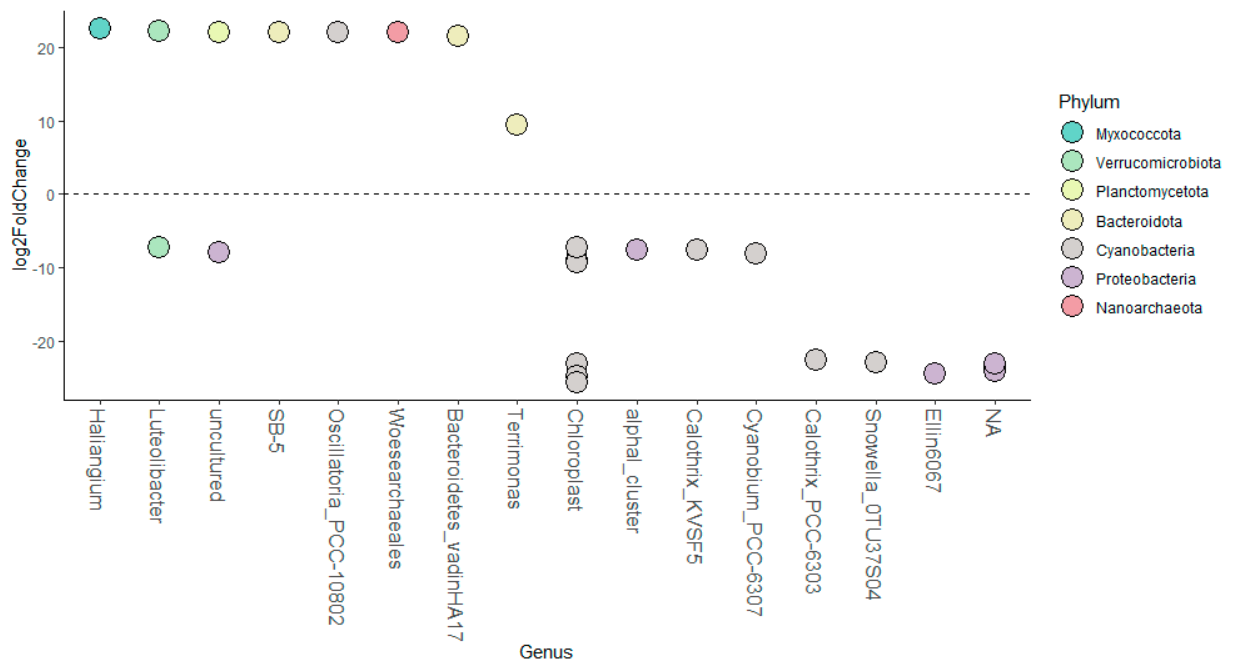

**Figure S11** Differential abundance testing using DESeq2. The contrast is set based on median concentration of methylmercury: High concentration over Low concentration. log2FoldChange is the effect size estimate.

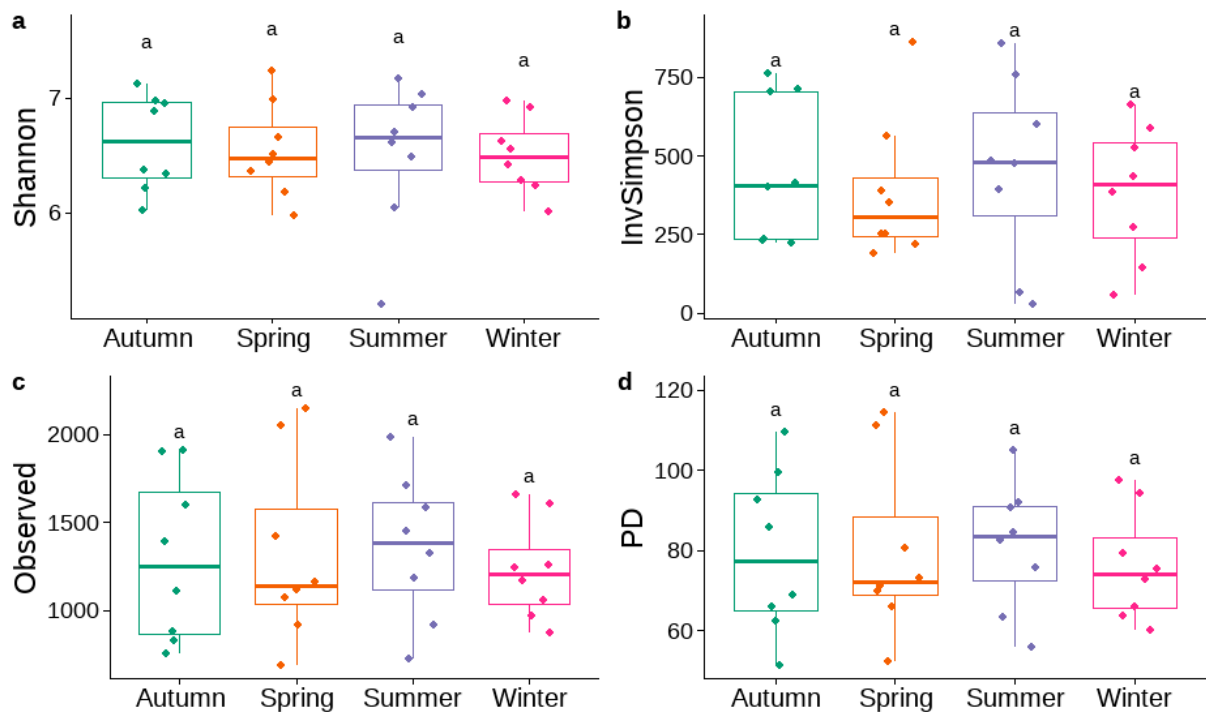

**Figure S12** A one-way ANOVA test on seasonal effect on Alpha diversity.

**Table S2** Top 10 t indicator value for each level of disturbance

| Group: Minor disturbances |        |        |             |                  |                     |                           |                           |                           |                             |
|---------------------------|--------|--------|-------------|------------------|---------------------|---------------------------|---------------------------|---------------------------|-----------------------------|
| indval                    | pval   | a.pval | Kingdom     | Phylum           | Class               | Order                     | Family                    | Genus                     | Species                     |
| 0,88                      | 0,0001 | 0,0095 | d__Bacteria | Acidobacteriota  | Holophagae          | Holophagales              | Holophagaceae             | Holophagaceae             | metagenome                  |
| 0,83                      | 0,0001 | 0,0095 | d__Bacteria | Proteobacteria   | Gammaproteobacteria | Burkholderiales           | Rhodocyclaceae            | Dechloromonas             |                             |
| 0,75                      | 0,0001 | 0,0095 | d__Bacteria | Bacteroidota     | Bacteroidia         | Bacteroidales             | SB-5                      | SB-5                      | uncultured_bacterium        |
| 0,73                      | 0,0001 | 0,0095 | d__Bacteria | Proteobacteria   | Gammaproteobacteria | Burkholderiales           | Hydrogenophilaceae        | Thiobacillus              |                             |
| 0,72                      | 0,0003 | 0,0190 | d__Bacteria | Desulfobacterota | Syntrophorhabdia    | Syntrophorhabdales        | Syntrophorhabdaceae       | Syntrophorhabdus          | uncultured_delta            |
| 0,71                      | 0,0044 | 0,0885 | d__Bacteria | Bacteroidota     | Bacteroidia         | Bacteroidetes_VC2.1_Bac22 | Bacteroidetes_VC2.1_Bac22 | Bacteroidetes_VC2.1_Bac22 | uncultured_soil             |
| 0,71                      | 0,0032 | 0,0732 | d__Bacteria | Bacteroidota     | Bacteroidia         | Bacteroidales             | Bacteroidetes_vadinHA17   | Bacteroidetes_vadinHA17   |                             |
| 0,71                      | 0,0003 | 0,0190 | d__Bacteria | NB1-j            | NB1-j               | NB1-j                     | NB1-j                     | NB1-j                     |                             |
| 0,70                      | 0,0090 | 0,1547 | d__Bacteria | Bacteroidota     | Bacteroidia         | Sphingobacteriales        | Lentimicrobiaceae         | Lentimicrobiaceae         | uncultured_bacterium        |
| 0,70                      | 0,0014 | 0,0464 | d__Bacteria | Proteobacteria   | Alphaproteobacteria | Rhizobiales               | Xanthobacteraceae         | Pseudolabrys              |                             |
| Group: Major disturbance  |        |        |             |                  |                     |                           |                           |                           |                             |
| indval                    | pval   | a.pval | Kingdom     | Phylum           | Class               | Order                     | Family                    | Genus                     | Species                     |
| 1,00                      | 0,0001 | 0,0095 | d__Bacteria | Cyanobacteria    | Cyanobacteriia      | Synechococcales           | Cyanobiaceae              | Cyanobium_PCC-6307        |                             |
| 1,00                      | 0,0001 | 0,0095 | d__Bacteria | Cyanobacteria    | Cyanobacteriia      | Oxyphotobacteria          | Unknown_Family            | Calothrix_KVSF5           | uncultured_bacterium        |
| 1,00                      | 0,0001 | 0,0095 | d__Bacteria | Proteobacteria   | Gammaproteobacteria | Burkholderiales           | Comamonadaceae            |                           |                             |
| 1,00                      | 0,0001 | 0,0095 | d__Bacteria | Proteobacteria   | Gammaproteobacteria | Burkholderiales           | Nitrosomonadaceae         | Ellin6067                 |                             |
| 1,00                      | 0,0001 | 0,0095 | d__Bacteria | Cyanobacteria    | Cyanobacteriia      | Chloroplast               | Chloroplast               | Chloroplast               | Planoglbratella_opercularis |
| 1,00                      | 0,0001 | 0,0095 | d__Bacteria | Proteobacteria   | Gammaproteobacteria | Burkholderiales           | Comamonadaceae            | Rhodoferax                |                             |
| 1,00                      | 0,0001 | 0,0095 | d__Bacteria | Cyanobacteria    | Cyanobacteriia      | Chloroplast               | Chloroplast               | Chloroplast               |                             |
| 0,99                      | 0,0001 | 0,0095 | d__Bacteria | Cyanobacteria    | Cyanobacteriia      | Chloroplast               | Chloroplast               | Chloroplast               | Planoglbratella_opercularis |
| 0,99                      | 0,0001 | 0,0095 | d__Bacteria | Chloroflexi      | Anaerolineae        | Caldilineales             | Caldilineaceae            | uncultured                | metagenome                  |

| 0,98               | 0,0001 | 0,0095 | d__Bacteria | Desulfobacterota | Desulfuromonadia    | Geobacterales      | Geobacteraceae          | Geobacter               |                         |
|--------------------|--------|--------|-------------|------------------|---------------------|--------------------|-------------------------|-------------------------|-------------------------|
| Group: Undisturbed |        |        |             |                  |                     |                    |                         |                         |                         |
| indval             | pval   | a.pval | Kingdom     | Phylum           | Class               | Order              | Family                  | Genus                   | Species                 |
| 1,00               | 0,0001 | 0,0095 | d__Bacteria | Bacteroidota     | Kryptonia           | Kryptoniales       | BSV26                   | BSV26                   | uncultured_bacterium    |
| 0,93               | 0,0001 | 0,0095 | d__Bacteria | Bacteroidota     | Bacteroidia         | Sphingobacteriales | Lentimicrobiaceae       | Lentimicrobiaceae       |                         |
| 0,92               | 0,0001 | 0,0095 | d__Archaea  | Crenarchaeota    | Bathyarchaeia       | Bathyarchaeia      | Bathyarchaeia           | Bathyarchaeia           | uncultured_methanogenic |
| 0,92               | 0,0001 | 0,0095 | d__Bacteria | Proteobacteria   | Alphaproteobacteria | Dongiales          | Dongiaceae              | Dongia                  | metagenome              |
| 0,92               | 0,0001 | 0,0095 | d__Bacteria | Chloroflexi      | Dehalococcoidia     | MSBL5              | MSBL5                   | MSBL5                   | uncultured_bacterium    |
| 0,89               | 0,0001 | 0,0095 | d__Bacteria | Bacteroidota     | Bacteroidia         | Bacteroidales      | Bacteroidetes_vadinHA17 | Bacteroidetes_vadinHA17 |                         |
| 0,86               | 0,0001 | 0,0095 | d__Archaea  | Crenarchaeota    | Bathyarchaeia       | Bathyarchaeia      | Bathyarchaeia           | Bathyarchaeia           | uncultured_methanogenic |
| 0,83               | 0,0001 | 0,0095 | d__Bacteria | Spirochaetota    | Spirochaetia        | Spirochaetales     | Spirochaetaceae         | Spirochaeta             |                         |
| 0,83               | 0,0001 | 0,0095 | d__Bacteria | Desulfobacterota | Desulfobacteria     | Desulfatiglandales | Desulfatiglandaceae     | Desulfatiglans          |                         |
| 0,83               | 0,0001 | 0,0095 | d__Bacteria | Chloroflexi      | Dehalococcoidia     | S085               | S085                    | S085                    | uncultured_bacterium    |

**Table S3** Top 10 indicator species with highest indicator value for high and low concentration of methylmercury.

| Group: High concentration MeHg |        |        |             |                  |                  |                  |                  |                  |                        |
|--------------------------------|--------|--------|-------------|------------------|------------------|------------------|------------------|------------------|------------------------|
| indval                         | pval   | a.pval | Kingdom     | Phylum           | Class            | Order            | Family           | Genus            | Species                |
| 0,81                           | 0,0002 | 0,4977 | d__Bacteria | Bacteroidota     | Bacteroidia      | Bacteroidales    | SB-5             | SB-5             | uncultured_bacterium   |
| 0,78                           | 0,0001 | 0,4977 | d__Bacteria | Bacteroidota     | SJA-28           | SJA-28           | SJA-28           | SJA-28           | uncultured_Chlorobi    |
| 0,77                           | 0,0005 | 0,4977 | d__Bacteria | Bacteroidota     | Bacteroidia      | Bacteroidales    | SB-5             | SB-5             | uncultured_bacterium   |
| 0,74                           | 0,0003 | 0,4977 | d__Bacteria | Nitrospirota     | 4-29-1           | 4-29-1           | 4-29-1           | 4-29-1           | uncultured_Nitrospirae |
| 0,72                           | 0,0001 | 0,4977 | d__Bacteria | Latescibacterota | Latescibacterota | Latescibacterota | Latescibacterota | Latescibacterota | uncultured_soil        |

|       |        |        |             |                   |                  |                |                         |                         |                         |
|-------|--------|--------|-------------|-------------------|------------------|----------------|-------------------------|-------------------------|-------------------------|
| 0,71  | 0,0010 | 0,5318 | d__Bacteria | Bacteroidota      | Bacteroidia      | Bacteroidales  | Bacteroidetes_vadinHA17 | Bacteroidetes_vadinHA17 | uncultured_bacterium    |
| 10,71 | 0,0003 | 0,4977 | d__Bacteria | Bacteroidota      | SJA-28           | SJA-28         | SJA-28                  | SJA-28                  | metagenome              |
| 0,70  | 0,0003 | 0,4977 | d__Archaea  | Crenarchaeota     | Bathyarchaeia    | Bathyarchaeia  | Bathyarchaeia           | Bathyarchaeia           |                         |
| 0,70  | 0,0007 | 0,4977 | d__Bacteria | Bacteroidota      | Bacteroidia      | Bacteroidales  | Bacteroidetes_vadinHA17 | Bacteroidetes_vadinHA17 | uncultured_Alkaliflexus |
| 0,69  | 0,0011 | 0,5318 | d__Bacteria | Verrucomicrobiota | Verrucomicrobiae | Pedosphaerales | Pedosphaeraceae         | ADurb.Bin063-1          | uncultured_bacterium    |

Group: Low concentration MeHg

| indval | pval   | a.pval | Kingdom     | Phylum           | Class               | Order              | Family                     | Genus             | Species              |
|--------|--------|--------|-------------|------------------|---------------------|--------------------|----------------------------|-------------------|----------------------|
| 0,75   | 0,0022 | 0,5713 | d__Bacteria | Bacteroidota     | Bacteroidia         | Cytophagales       | Spirosomaceae              | Lacihabitans      | uncultured_bacterium |
| 0,72   | 0,0074 | 0,6881 | d__Bacteria | Bacteroidota     | Bacteroidia         | Flavobacteriales   | Flavobacteriaceae          | Flavobacterium    |                      |
| 0,68   | 0,0005 | 0,4977 | d__Bacteria | Bacteroidota     | Bacteroidia         | Sphingobacteriales | AKYH767                    | AKYH767           | uncultured_bacterium |
| 0,67   | 0,0015 | 0,5494 | d__Bacteria | Cyanobacteria    | Cyanobacteriia      | Chloroplast        | Chloroplast                | Chloroplast       |                      |
| 0,65   | 0,0283 | 0,9737 | d__Bacteria | Bacteroidota     | Bacteroidia         | Chitinophagales    | Saprospiraceae             | Haliscomenobacter |                      |
| 0,65   | 0,0029 | 0,5746 | d__Bacteria | Bacteroidota     | Bacteroidia         | Chitinophagales    | Saprospiraceae             | uncultured        | metagenome           |
| 0,65   | 0,0068 | 0,6881 | d__Bacteria | Actinobacteriota | Actinobacteria      | PeM15              | PeM15                      | PeM15             | metagenome           |
| 0,64   | 0,0307 | 0,9769 | d__Bacteria | Bacteroidota     | Bacteroidia         | Chitinophagales    | Saprospiraceae             | uncultured        |                      |
| 0,63   | 0,0010 | 0,5318 | d__Bacteria | Chloroflexi      | Anaerolineae        | Caldilineales      | Caldilineaceae             | uncultured        | metagenome           |
| 0,63   | 0,0004 | 0,4977 | d__Bacteria | Proteobacteria   | Alphaproteobacteria | Rhizobiales        | Rhizobiales_Incertae_Sedis | uncultured        | metagenome           |

**Table S4** Top 10 indicator species with highest indicator value for high and low concentration of mercury.

| Group: High concentration Hg |        |        |             |                   |                     |                    |                         |                         |                         |
|------------------------------|--------|--------|-------------|-------------------|---------------------|--------------------|-------------------------|-------------------------|-------------------------|
| indval                       | pval   | a.pval | Kingdom     | Phylum            | Class               | Order              | Family                  | Genus                   | Species                 |
| 0,76                         | 0,0002 | 0,1450 | d__Bacteria | Bacteroidota      | Bacteroidia         | Bacteroidales      | Bacteroidetes_vadinHA17 | Bacteroidetes_vadinHA17 |                         |
| 0,75                         | 0,0002 | 0,1450 | d__Bacteria | Nitrospirota      | 4-29-1              | 4-29-1             | 4-29-1                  | 4-29-1                  | uncultured_Nitrospirae  |
| 0,75                         | 0,0001 | 0,1209 | d__Bacteria | Bacteroidota      | Kryptonia           | Kryptoniales       | BSV26                   | BSV26                   | uncultured_bacterium    |
| 0,73                         | 0,0018 | 0,3326 | d__Bacteria | Bacteroidota      | SJA-28              | SJA-28             | SJA-28                  | SJA-28                  | uncultured_Chlorobi     |
| 0,72                         | 0,0004 | 0,1667 | d__Bacteria | Proteobacteria    | Gammaproteobacteria | Burkholderiales    | Rhodocyclaceae          | Sterolibacterium        | uncultured_bacterium    |
| 0,72                         | 0,0012 | 0,3081 | d__Archaea  | Crenarchaeota     | Bathyarchaeia       | Bathyarchaeia      | Bathyarchaeia           | Bathyarchaeia           | uncultured_methanogenic |
| 0,72                         | 0,0002 | 0,1450 | d__Bacteria | Myxococcota       | Myxococcia          | Myxococcales       | Anaeromyxobacteraceae   | Anaeromyxobacter        | uncultured_delta        |
| 0,71                         | 0,0012 | 0,3081 | d__Bacteria | Bacteroidota      | Bacteroidia         | Flavobacteriales   | Flavobacteriaceae       | Flavobacterium          |                         |
| 0,71                         | 0,0003 | 0,1450 | d__Bacteria | Spirochaetota     | Spirochaetia        | Spirochaetales     | Spirochaetaceae         | Spirochaeta             | uncultured_bacterium    |
| 0,71                         | 0,0009 | 0,2530 | d__Bacteria | Spirochaetota     | Spirochaetia        | Spirochaetales     | Spirochaetaceae         | Spirochaeta             | Spirochaeta_sp.         |
| Group: Low concentration Hg  |        |        |             |                   |                     |                    |                         |                         |                         |
| indval                       | pval   | a.pval | Kingdom     | Phylum            | Class               | Order              | Family                  | Genus                   | Species                 |
| 0,89                         | 0,0001 | 0,1209 | d__Bacteria | Proteobacteria    | Alphaproteobacteria | Rhodobacterales    | Rhodobacteraceae        | Flavimaricola           | uncultured_bacterium    |
| 0,78                         | 0,0001 | 0,1209 | d__Bacteria | Verrucomicrobiota | Verrucomicrobiae    | Verrucomicrobiales | Rubritaleaceae          | Luteolibacter           |                         |
| 0,78                         | 0,0005 | 0,1777 | d__Bacteria | Verrucomicrobiota | Verrucomicrobiae    | Verrucomicrobiales | Verrucomicrobiaceae     | uncultured              |                         |
| 0,77                         | 0,0001 | 0,1209 | d__Bacteria | Bacteroidota      | Bacteroidia         | Chitinophagales    | Chitinophagaceae        | Aurantisolimonas        |                         |
| 0,75                         | 0,0002 | 0,1450 | d__Bacteria | Planctomycetota   | Planctomycetes      | Gemmatales         | Gemmataceae             | uncultured              | metagenome              |
| 0,75                         | 0,0007 | 0,2014 | d__Bacteria | Verrucomicrobiota | Verrucomicrobiae    | Verrucomicrobiales | Verrucomicrobiaceae     | uncultured              | uncultured_soil         |

|      |        |        |             |                  |                     |                   |                    |                   |                      |
|------|--------|--------|-------------|------------------|---------------------|-------------------|--------------------|-------------------|----------------------|
| 0,74 | 0,0006 | 0,1813 | d__Bacteria | Cyanobacteria    | Cyanobacteriia      | Chloroplast       | Chloroplast        | Chloroplast       |                      |
| 0,74 | 0,0001 | 0,1209 | d__Bacteria | Cyanobacteria    | Cyanobacteriia      | Chloroplast       | Chloroplast        | Chloroplast       |                      |
| 0,71 | 0,0287 | 0,7492 | d__Bacteria | Desulfobacterota | Desulfobacteria     | Desulfobacterales | Desulfosarcinaceae | Desulfatirhabdium | uncultured_bacterium |
| 0,71 | 0,0054 | 0,4144 | d__Bacteria | Proteobacteria   | Gammaproteobacteria | Methylococcales   | Methylomonadaceae  | Methylobacter     | uncultured_bacterium |

---

**Table S5.** Summary of indicator species affiliation to phyla. The table shows a number of indicator species in each phyla. Total number of indicator species is 223, 161 and 674 for mercury, methylmercury and the level of disturbance, respectively.

|    | Phylum            | High conc. Hg   | Low conc. Hg   |
|----|-------------------|-----------------|----------------|
| 1  | Proteobacteria    | 30              | 32             |
| 2  | Bacteroidota      | 29              | 20             |
| 3  | Cyanobacteria     | 0               | 17             |
| 4  | Chloroflexi       | 7               | 7              |
| 5  | Verrucomicrobiota | 6               | 8              |
| 6  | Desulfobacterota  | 8               | 5              |
| 7  | Acidobacteriota   | 8               | 3              |
| 8  | Actinobacteriota  | 2               | 7              |
| 9  | Crenarchaeota     | 6               | 1              |
| 10 | Myxococcota       | 2               | 5              |
| 11 | Spirochaetota     | 6               | 0              |
| 12 | Planctomycetota   | 1               | 4              |
| 13 | Nitrospirota      | 2               | 0              |
| 14 | Latescibacterota  | 2               | 0              |
| 15 | Thermoplasmatota  | 1               | 0              |
| 16 | Firmicutes        | 0               | 1              |
| 17 | Sva0485           | 1               | 0              |
| 18 | Abditibacteriota  | 0               | 1              |
| 19 | Methylomirabilota | 1               | 0              |
|    |                   |                 |                |
|    | Phylum            | High conc. MeHg | Low conc. MeHg |
| 1  | Bacteroidota      | 42              | 13             |
| 2  | Proteobacteria    | 19              | 13             |
| 3  | Chloroflexi       | 10              | 2              |
| 4  | Verrucomicrobiota | 7               | 3              |
| 5  | Desulfobacterota  | 9               | 0              |
| 6  | Cyanobacteria     | 0               | 9              |
| 7  | Acidobacteriota   | 5               | 1              |
| 8  | Crenarchaeota     | 4               | 0              |
| 9  | Latescibacterota  | 3               | 0              |
| 10 | Planctomycetota   | 2               | 1              |
| 11 | Myxococcota       | 1               | 2              |
| 12 | Halobacterota     | 3               | 0              |
| 13 | Nitrospirota      | 2               | 0              |
| 14 | Thermoplasmatota  | 2               | 0              |
| 15 | Spirochaetota     | 2               | 0              |

|    |                   |       |       |             |
|----|-------------------|-------|-------|-------------|
| 16 | Actinobacteriota  | 1     | 1     |             |
| 17 | Fibrobacterota    | 1     | 0     |             |
| 18 | Gemmatimonadota   | 1     | 0     |             |
| 19 | NB1-j             | 1     | 0     |             |
| 20 | Zixibacteria      | 1     | 0     |             |
|    | Phylum            | Minor | Major | Undisturbed |
| 1  | Proteobacteria    | 32    | 92    | 43          |
| 2  | Bacteroidota      | 34    | 67    | 57          |
| 3  | Cyanobacteria     | 0     | 71    | 1           |
| 4  | Verrucomicrobiota | 15    | 26    | 11          |
| 5  | Planctomycetota   | 6     | 27    | 6           |
| 6  | Chloroflexi       | 3     | 13    | 23          |
| 7  | Acidobacteriota   | 19    | 5     | 9           |
| 8  | Desulfobacterota  | 7     | 4     | 10          |
| 9  | Actinobacteriota  | 4     | 14    | 1           |
| 10 | Crenarchaeota     | 2     | 0     | 13          |
| 11 | Spirochaetota     | 0     | 1     | 11          |
| 12 | Myxococcota       | 0     | 6     | 4           |
| 13 | Latescibacterota  | 1     | 1     | 4           |
| 14 | Thermoplasmata    | 0     | 0     | 6           |
| 15 | Sva0485           | 1     | 0     | 3           |
| 16 | Methylobacteriota | 2     | 0     | 1           |
| 17 | RCP2-54           | 2     | 0     | 0           |
| 18 | Firmicutes        | 1     | 1     | 0           |
| 19 | Gemmatimonadota   | 0     | 1     | 1           |
| 20 | Nitrospirota      | 0     | 0     | 2           |
| 21 | Halobacterota     | 0     | 0     | 2           |
| 22 | NB1-j             | 1     | 0     | 0           |
| 23 | Nitrospinota      | 1     | 0     | 0           |
| 24 | Dadabacteria      | 1     | 0     | 0           |
| 25 | Nanoarchaeota     | 0     | 1     | 0           |
| 26 | Bdellovibrionota  | 0     | 0     | 1           |
| 27 | Fibrobacterota    | 0     | 0     | 1           |
| 28 | Iainarchaeota     | 0     | 0     | 1           |
| 29 | LCP-89            | 0     | 0     | 1           |
